# Supplementary material for: Tuning Brønsted and Lewis acidity on phosphated titanium dioxides for efficient conversion of glucose to 5-hydroxymethylfurfural
Source: Royal Society of Chemistry journal article supplement (doi:10.1039/d1ra06002c), 2021-01-01
Supplement: d1ra06002c1.pdf [file d1ra06002c1.pdf]

1

## Supplementary Information

2 **Tuning Brønsted and Lewis Acidity on Phosphated Titanium Dioxides**

3 **for Efficient Conversion of Glucose to 5-hydroxymethylfurfural**

4 Siripit Songtawee,<sup>ab</sup> Bunyarat Rungtaweavoranit,<sup>a</sup> Chalida Klaysom,<sup>bc</sup>

5 and Kajornsak Faungnawakij <sup>\*a</sup>

6 *<sup>a</sup> NanoCatalysis and Molecular Simulation Research Group, National Nanotechnology*

7 *Center (NANOTEC), National Science and Technology Development Agency (NSTDA),*

8 *Pathumthani 12120, Thailand*

9 *<sup>b</sup> Center of Excellence in Particle and Material Processing Technology, Department of*

10 *Chemical Engineering, Faculty of Engineering, Chulalongkorn University, Bangkok,*

11 *Thailand*

12 *<sup>c</sup> Bio-Circular-Green Economy Technology & Engineering Center (BCGeTEC), Department*

13 *of Chemical Engineering, Faculty of Engineering, Chulalongkorn University, Bangkok,*

14 *Thailand*

15 *\* Corresponding author: Tel.: +66 2 564 7100, Fax: +66 2 564 6981,*

16 *E-mail address: kajornsak@nanotec.or.th*

17

18

19

20

21

22

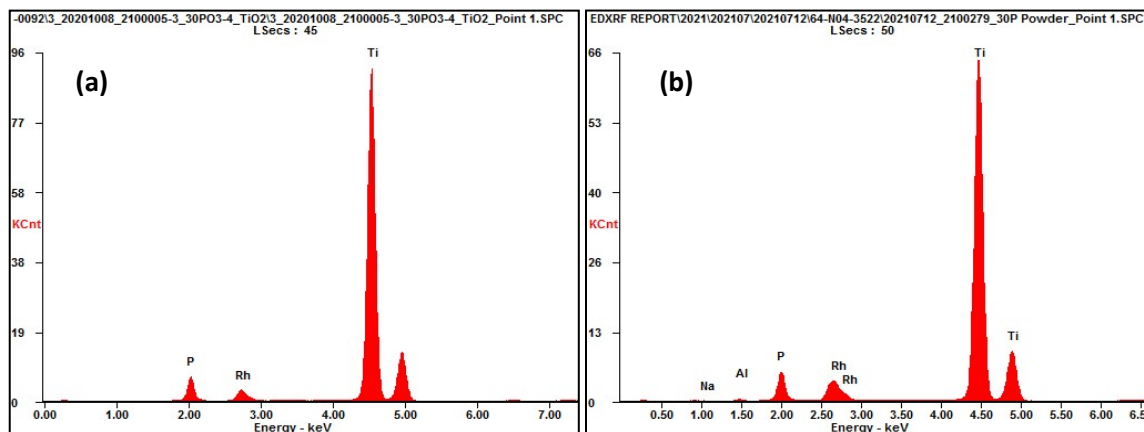

23 **Fig. S1** The  $\mu$ -EDXRF spectra of (a) fresh and (b) spent of 30P-TiO<sub>2</sub> catalyst

24

25 **Table S1** The elemental analysis of fresh and spent of 30P-TiO<sub>2</sub> catalysts by  $\mu$ -EDXRF

| Element (%) | Fresh 30P-TiO <sub>2</sub> | Spent 30P-TiO <sub>2</sub> |
|-------------|----------------------------|----------------------------|
| P           | 15.2                       | 12.6                       |
| Ti          | 84.8                       | 80.1                       |
| Na          | -                          | 5.7                        |

26

27
